# Supplementary material
Source: MDPI journal article supplement (https://www.mdpi.com/2075-163X/12/10/1224)
Supplement: s1 [file s1]

Table S1 The oxygen, carbon and strontium isotopes of different types of dolomites in the

## Xixiangchi Formation.

| Sample No. | phase | $\delta^{13}\text{C}_{\text{PDB}}(\text{‰})$ | $\delta^{18}\text{O}_{\text{PDB}}(\text{‰})$ | $^{87}\text{Sr}/^{86}\text{Sr}$ | Error( $2\sigma$ ) |
|------------|-------|----------------------------------------------|----------------------------------------------|---------------------------------|--------------------|
|            |       | (PDB)                                        | (PDB)                                        |                                 |                    |
| S1*        | D1    | -1.4                                         | -8.9                                         | 0.70988                         | 0.00003            |
| S2*        | D1    | -1.5                                         | -9.3                                         | 0.70965                         | 0.00002            |
| S3*        | D1    | -1.2                                         | -9.1                                         |                                 |                    |
| S4*        | D1    | -1.2                                         | -10.2                                        |                                 |                    |
| S5*        | D1    | -1.4                                         | -10.3                                        |                                 |                    |
| S6*        | D1    | -1.6                                         | -10.1                                        | 0.71270                         | 0.00004            |
| S7*        | D1    | -2.0                                         | -10.2                                        |                                 |                    |
| S8*        | D1    | -1.9                                         | -10.1                                        |                                 |                    |
| S9*        | D1    | -1.6                                         | -9.4                                         |                                 |                    |
| S10*       | D1    | -1.6                                         | -9.0                                         | 0.71027                         | 0.00003            |
| S11*       | D2    | -2.1                                         | -9.5                                         |                                 |                    |
| S12*       | D2    | -1.7                                         | -9.4                                         | 0.71064                         | 0.00006            |
| S13*       | D2    | -0.9                                         | -8.6                                         |                                 |                    |
| S14*       | D2    | -1.1                                         | -9.1                                         | 0.70982                         | 0.00009            |
| S15*       | D2    | -1.2                                         | -9.3                                         |                                 |                    |
| S16*       | D2    | -2.0                                         | -7.5                                         |                                 |                    |
| S17*       | D2    | -2.0                                         | -7.9                                         | 0.70949                         | 0.00002            |
| S18*       | D2    | -1.1                                         | -9.7                                         | 0.70981                         | 0.00001            |

|      |    |      |       |         |         |
|------|----|------|-------|---------|---------|
| S19* | D2 | -1.0 | -8.6  | 0.70990 | 0.00004 |
| S20* | D2 | -1.0 | -8.1  |         |         |
| S21* | D2 | -1.3 | -9.1  | 0.70987 | 0.00006 |
| S22* | D2 | -1.3 | -10.0 |         |         |
| S23  | D3 | -1.4 | -10.7 |         |         |
| S24  | D3 |      |       | 0.71037 | 0.00004 |
| S25  | D3 | -1.2 | -10.5 |         |         |
| S26  | D3 | -1.3 | -11.0 |         |         |
| S27  | D3 | -1.6 | -10.0 | 0.70941 | 0.00003 |
| S28  | D3 | -1.4 | -9.8  |         |         |
| S29* | SD | -2.1 | -11.2 | 0.70937 | 0.00006 |
| S30* | SD | -2.3 | -11.5 | 0.70941 | 0.00006 |
| S31* | SD | -2.1 | -10.8 |         |         |
| S32* | SD | -2.0 | -10.8 |         |         |
| S33* | SD | -2.1 | -10.4 |         |         |
| S34* | SD | -2.2 | -10.9 |         | 0.00001 |
| S35* | SD | -2.2 | -11.3 | 0.70941 | 0.00002 |
| S36* | SD | -2.2 | -11.6 |         | 0.00001 |
| S37* | SD | -2.2 | -11.0 | 0.70945 | 0.00001 |
| S38* | SD | -2.1 | -11.3 | 0.70943 | 0.00001 |

---

Data marked with “\*” refers to sample previously reported by Liang et al [45].

Table S2 REE concentrations of different types of dolomites in the Xixiangchi Formation.

| Sample No. | phase | La<br>(ppm) | Ce<br>(ppm) | Pr<br>(ppm) | Nd<br>(ppm) | Sm<br>(ppm) | Eu<br>(ppm) | Gd<br>(ppm) | Tb<br>(ppm) | Dy<br>(ppm) | Ho<br>(ppm) | Er<br>(ppm) | Tm<br>(ppm) | Yb<br>(ppm) | Lu<br>(ppm) | ΣLREE<br>(ppm) | ΣHREE<br>(ppm) | ΣREE<br>(ppm) |
|------------|-------|-------------|-------------|-------------|-------------|-------------|-------------|-------------|-------------|-------------|-------------|-------------|-------------|-------------|-------------|----------------|----------------|---------------|
| S1         | D1    | 1.45        | 2.84        | 0.35        | 1.22        | 0.23        | 0.03        | 0.19        | 0.03        | 0.18        | 0.04        | 0.09        | 0.01        | 0.07        | 0.01        | 6.12           | 0.61           | 6.73          |
| S2         | D1    | 0.91        | 1.91        | 0.23        | 0.80        | 0.15        | 0.02        | 0.13        | 0.02        | 0.12        | 0.02        | 0.06        | 0.01        | 0.05        | 0.01        | 4.03           | 0.42           | 4.45          |
| S4         | D1    | 1.62        | 3.16        | 0.37        | 1.31        | 0.25        | 0.03        | 0.21        | 0.03        | 0.19        | 0.04        | 0.09        | 0.01        | 0.08        | 0.01        | 6.74           | 0.67           | 7.41          |
| S5         | D1    | 2.70        | 4.90        | 0.57        | 1.97        | 0.36        | 0.05        | 0.33        | 0.05        | 0.28        | 0.06        | 0.14        | 0.02        | 0.11        | 0.02        | 10.54          | 1.00           | 11.54         |
| S6         | D1    | 0.96        | 2.24        | 0.28        | 1.03        | 0.21        | 0.02        | 0.16        | 0.03        | 0.16        | 0.03        | 0.08        | 0.01        | 0.08        | 0.01        | 4.75           | 0.56           | 5.31          |
| S8         | D1    | 2.21        | 4.49        | 0.58        | 2.09        | 0.43        | 0.05        | 0.36        | 0.06        | 0.37        | 0.07        | 0.18        | 0.03        | 0.16        | 0.02        | 9.84           | 1.25           | 11.09         |
| S10        | D1    | 1.92        | 3.96        | 0.50        | 1.78        | 0.35        | 0.04        | 0.31        | 0.04        | 0.26        | 0.05        | 0.13        | 0.02        | 0.11        | 0.02        | 8.56           | 0.93           | 9.49          |
| S11        | D2    | 1.76        | 2.85        | 0.32        | 1.12        | 0.21        | 0.04        | 0.19        | 0.03        | 0.16        | 0.03        | 0.08        | 0.01        | 0.07        | 0.01        | 6.30           | 0.58           | 6.87          |
| S12        | D2    | 1.12        | 2.40        | 0.29        | 1.07        | 0.23        | 0.04        | 0.21        | 0.03        | 0.21        | 0.04        | 0.11        | 0.02        | 0.09        | 0.01        | 5.16           | 0.72           | 5.87          |
| S13        | D2    | 0.79        | 1.59        | 0.19        | 0.64        | 0.13        | 0.02        | 0.12        | 0.02        | 0.11        | 0.02        | 0.06        | 0.01        | 0.05        | 0.01        | 3.36           | 0.40           | 3.76          |
| S14        | D2    | 1.38        | 2.58        | 0.32        | 1.11        | 0.24        | 0.04        | 0.21        | 0.03        | 0.21        | 0.04        | 0.11        | 0.02        | 0.09        | 0.01        | 5.66           | 0.72           | 6.38          |
| S15        | D2    | 1.39        | 2.52        | 0.32        | 1.11        | 0.23        | 0.04        | 0.20        | 0.03        | 0.19        | 0.04        | 0.10        | 0.01        | 0.09        | 0.01        | 5.60           | 0.68           | 6.28          |
| S16        | D2    | 1.83        | 3.50        | 0.40        | 1.40        | 0.28        | 0.05        | 0.25        | 0.04        | 0.21        | 0.04        | 0.10        | 0.01        | 0.09        | 0.01        | 7.45           | 0.76           | 8.21          |
| S18        | D2    | 2.05        | 3.85        | 0.42        | 1.49        | 0.28        | 0.04        | 0.27        | 0.04        | 0.24        | 0.05        | 0.12        | 0.02        | 0.10        | 0.01        | 8.14           | 0.85           | 8.99          |
| S19        | D2    | 2.60        | 5.12        | 0.60        | 2.18        | 0.42        | 0.06        | 0.36        | 0.06        | 0.34        | 0.07        | 0.18        | 0.03        | 0.16        | 0.02        | 10.98          | 1.21           | 12.18         |
| S21        | D2    | 1.32        | 2.58        | 0.31        | 1.11        | 0.22        | 0.03        | 0.20        | 0.03        | 0.18        | 0.04        | 0.09        | 0.01        | 0.08        | 0.01        | 5.57           | 0.64           | 6.21          |
| S23        | D3    | 2.17        | 3.41        | 0.40        | 1.38        | 0.26        | 0.04        | 0.25        | 0.04        | 0.21        | 0.04        | 0.10        | 0.01        | 0.08        | 0.01        | 7.66           | 0.74           | 8.40          |
| S24        | D3    | 1.04        | 2.26        | 0.27        | 0.93        | 0.19        | 0.03        | 0.18        | 0.03        | 0.16        | 0.03        | 0.08        | 0.01        | 0.07        | 0.01        | 4.72           | 0.56           | 5.28          |
| S25        | D3    | 1.10        | 1.89        | 0.21        | 0.71        | 0.14        | 0.03        | 0.14        | 0.02        | 0.13        | 0.03        | 0.06        | 0.01        | 0.05        | 0.01        | 4.07           | 0.44           | 4.52          |
| S26        | D3    | 1.08        | 1.89        | 0.21        | 0.73        | 0.15        | 0.03        | 0.14        | 0.02        | 0.13        | 0.03        | 0.07        | 0.01        | 0.05        | 0.01        | 4.09           | 0.46           | 4.55          |
| S27        | D3    | 1.13        | 2.17        | 0.26        | 0.94        | 0.20        | 0.03        | 0.18        | 0.03        | 0.17        | 0.04        | 0.09        | 0.01        | 0.08        | 0.01        | 4.73           | 0.61           | 5.34          |
| S29        | SD    | 1.05        | 2.42        | 0.33        | 1.27        | 0.29        | 0.04        | 0.24        | 0.04        | 0.24        | 0.05        | 0.13        | 0.02        | 0.13        | 0.02        | 5.40           | 0.88           | 6.28          |
| S30        | SD    | 1.50        | 3.66        | 0.49        | 1.89        | 0.43        | 0.06        | 0.36        | 0.06        | 0.37        | 0.08        | 0.21        | 0.03        | 0.22        | 0.03        | 8.03           | 1.35           | 9.39          |
| S31        | SD    | 1.12        | 2.76        | 0.38        | 1.47        | 0.34        | 0.05        | 0.28        | 0.05        | 0.29        | 0.06        | 0.16        | 0.03        | 0.17        | 0.03        | 6.12           | 1.06           | 7.18          |
| S32        | SD    | 1.01        | 2.32        | 0.31        | 1.18        | 0.27        | 0.04        | 0.23        | 0.04        | 0.22        | 0.05        | 0.13        | 0.02        | 0.13        | 0.02        | 5.11           | 0.84           | 5.95          |

|     |    |      |      |      |      |      |      |      |      |      |      |      |      |      |      |      |      |      |
|-----|----|------|------|------|------|------|------|------|------|------|------|------|------|------|------|------|------|------|
| S33 | SD | 0.83 | 1.88 | 0.25 | 0.97 | 0.22 | 0.03 | 0.19 | 0.03 | 0.18 | 0.04 | 0.10 | 0.02 | 0.10 | 0.02 | 4.18 | 0.67 | 4.85 |
| S34 | SD | 0.94 | 2.26 | 0.31 | 1.19 | 0.27 | 0.04 | 0.22 | 0.04 | 0.23 | 0.05 | 0.13 | 0.02 | 0.13 | 0.02 | 4.99 | 0.84 | 5.83 |
| S35 | SD | 0.62 | 1.51 | 0.20 | 0.79 | 0.18 | 0.02 | 0.15 | 0.02 | 0.15 | 0.03 | 0.08 | 0.01 | 0.09 | 0.01 | 3.32 | 0.55 | 3.87 |
| S36 | SD | 0.90 | 1.93 | 0.25 | 0.95 | 0.21 | 0.03 | 0.18 | 0.03 | 0.17 | 0.04 | 0.09 | 0.01 | 0.09 | 0.01 | 4.25 | 0.62 | 4.88 |
| S37 | SD | 0.49 | 1.15 | 0.15 | 0.59 | 0.13 | 0.02 | 0.11 | 0.02 | 0.11 | 0.02 | 0.06 | 0.01 | 0.07 | 0.01 | 2.54 | 0.42 | 2.96 |
| S38 | SD | 0.80 | 1.91 | 0.26 | 1.01 | 0.23 | 0.03 | 0.20 | 0.03 | 0.20 | 0.04 | 0.11 | 0.02 | 0.11 | 0.02 | 4.24 | 0.71 | 4.95 |

Data marked with “\*” refers to sample previously reported by Liang et al [45].

Table S3 PAAS-normalized REEs of different types of dolomites in the Xixiangchi Formation.

| Sample No. | Phase | La <sub>SN</sub> | Ce <sub>SN</sub> | Pr <sub>SN</sub> | Nd <sub>SN</sub> | Sm <sub>SN</sub> | Eu <sub>SN</sub> | Gd <sub>SN</sub> | Tb <sub>SN</sub> | Dy <sub>SN</sub> | Ho <sub>SN</sub> | Er <sub>SN</sub> | Tm <sub>SN</sub> | Yb <sub>SN</sub> | Lu <sub>SN</sub> | (Nb/Yb) <sub>SN</sub> | Eu/Eu* | Ce/Ce* |
|------------|-------|------------------|------------------|------------------|------------------|------------------|------------------|------------------|------------------|------------------|------------------|------------------|------------------|------------------|------------------|-----------------------|--------|--------|
| S1*        | D1    | 0.04             | 0.04             | 0.04             | 0.04             | 0.04             | 0.03             | 0.04             | 0.04             | 0.04             | 0.04             | 0.03             | 0.03             | 0.02             | 0.02             | 1.47                  | 0.67   | 0.83   |
| S2*        | D1    | 0.02             | 0.02             | 0.03             | 0.02             | 0.03             | 0.02             | 0.03             | 0.03             | 0.03             | 0.03             | 0.02             | 0.02             | 0.02             | 0.02             | 1.37                  | 0.65   | 0.84   |
| S4*        | D1    | 0.04             | 0.04             | 0.04             | 0.04             | 0.04             | 0.03             | 0.05             | 0.04             | 0.04             | 0.04             | 0.03             | 0.03             | 0.03             | 0.03             | 1.40                  | 0.67   | 0.86   |
| S5*        | D1    | 0.07             | 0.06             | 0.06             | 0.06             | 0.06             | 0.04             | 0.07             | 0.06             | 0.06             | 0.06             | 0.05             | 0.05             | 0.04             | 0.04             | 1.51                  | 0.69   | 0.87   |
| S6*        | D1    | 0.03             | 0.03             | 0.03             | 0.03             | 0.04             | 0.02             | 0.03             | 0.03             | 0.03             | 0.03             | 0.03             | 0.03             | 0.03             | 0.03             | 1.12                  | 0.58   | 0.85   |
| S8*        | D1    | 0.06             | 0.06             | 0.07             | 0.06             | 0.08             | 0.05             | 0.08             | 0.07             | 0.08             | 0.07             | 0.06             | 0.07             | 0.06             | 0.05             | 1.11                  | 0.66   | 0.82   |
| S11*       | D1    | 0.05             | 0.05             | 0.06             | 0.05             | 0.06             | 0.04             | 0.07             | 0.06             | 0.06             | 0.05             | 0.04             | 0.05             | 0.04             | 0.04             | 1.40                  | 0.67   | 0.82   |
| S12*       | D2    | 0.05             | 0.04             | 0.04             | 0.03             | 0.04             | 0.03             | 0.04             | 0.04             | 0.03             | 0.03             | 0.03             | 0.03             | 0.02             | 0.02             | 1.43                  | 0.90   | 0.91   |
| S13*       | D2    | 0.03             | 0.03             | 0.03             | 0.03             | 0.04             | 0.04             | 0.04             | 0.04             | 0.04             | 0.04             | 0.04             | 0.04             | 0.03             | 0.03             | 0.95                  | 0.89   | 0.87   |
| S14*       | D2    | 0.02             | 0.02             | 0.02             | 0.02             | 0.02             | 0.02             | 0.03             | 0.02             | 0.02             | 0.02             | 0.02             | 0.02             | 0.02             | 0.02             | 1.12                  | 0.89   | 0.86   |
| S15*       | D2    | 0.04             | 0.03             | 0.04             | 0.03             | 0.04             | 0.04             | 0.05             | 0.04             | 0.04             | 0.04             | 0.04             | 0.04             | 0.03             | 0.03             | 1.00                  | 0.84   | 0.83   |
| S16*       | D2    | 0.04             | 0.03             | 0.04             | 0.03             | 0.04             | 0.04             | 0.04             | 0.04             | 0.04             | 0.04             | 0.03             | 0.04             | 0.03             | 0.03             | 1.06                  | 0.84   | 0.81   |
| S17*       | D2    | 0.05             | 0.04             | 0.04             | 0.04             | 0.05             | 0.04             | 0.05             | 0.05             | 0.04             | 0.04             | 0.04             | 0.04             | 0.03             | 0.03             | 1.34                  | 0.88   | 0.90   |
| S19*       | D2    | 0.05             | 0.05             | 0.05             | 0.04             | 0.05             | 0.04             | 0.06             | 0.05             | 0.05             | 0.05             | 0.04             | 0.04             | 0.03             | 0.03             | 1.27                  | 0.81   | 0.94   |
| S20*       | D2    | 0.07             | 0.06             | 0.07             | 0.06             | 0.07             | 0.06             | 0.08             | 0.07             | 0.07             | 0.07             | 0.06             | 0.06             | 0.06             | 0.05             | 1.16                  | 0.76   | 0.89   |
| S22*       | D2    | 0.03             | 0.03             | 0.04             | 0.03             | 0.04             | 0.03             | 0.04             | 0.04             | 0.04             | 0.04             | 0.03             | 0.03             | 0.03             | 0.02             | 1.23                  | 0.81   | 0.85   |
| S23        | D3    | 0.06             | 0.04             | 0.05             | 0.04             | 0.05             | 0.04             | 0.05             | 0.05             | 0.04             | 0.04             | 0.04             | 0.03             | 0.03             | 0.03             | 1.48                  | 0.88   | 0.85   |
| S24        | D3    | 0.03             | 0.03             | 0.03             | 0.03             | 0.03             | 0.03             | 0.04             | 0.03             | 0.03             | 0.03             | 0.03             | 0.03             | 0.02             | 0.02             | 1.18                  | 0.88   | 0.86   |
| S25        | D3    | 0.03             | 0.02             | 0.02             | 0.02             | 0.03             | 0.02             | 0.03             | 0.03             | 0.03             | 0.03             | 0.02             | 0.02             | 0.02             | 0.01             | 1.29                  | 0.92   | 0.91   |
| S26        | D3    | 0.03             | 0.02             | 0.02             | 0.02             | 0.03             | 0.02             | 0.03             | 0.03             | 0.03             | 0.03             | 0.02             | 0.02             | 0.02             | 0.02             | 1.22                  | 0.88   | 0.89   |
| S27        | D3    | 0.03             | 0.03             | 0.03             | 0.03             | 0.04             | 0.03             | 0.04             | 0.04             | 0.04             | 0.04             | 0.03             | 0.03             | 0.03             | 0.03             | 0.98                  | 0.85   | 0.88   |
| S29*       | SD    | 0.03             | 0.03             | 0.04             | 0.04             | 0.05             | 0.04             | 0.05             | 0.05             | 0.05             | 0.05             | 0.05             | 0.05             | 0.05             | 0.05             | 0.79                  | 0.71   | 0.84   |
| S30*       | SD    | 0.04             | 0.05             | 0.06             | 0.06             | 0.08             | 0.05             | 0.08             | 0.08             | 0.08             | 0.08             | 0.07             | 0.08             | 0.08             | 0.08             | 0.72                  | 0.70   | 0.82   |

|      |    |      |      |      |      |      |      |      |      |      |      |      |      |      |      |      |      |      |
|------|----|------|------|------|------|------|------|------|------|------|------|------|------|------|------|------|------|------|
| S31* | SD | 0.03 | 0.03 | 0.04 | 0.04 | 0.06 | 0.04 | 0.06 | 0.06 | 0.06 | 0.06 | 0.06 | 0.07 | 0.06 | 0.06 | 0.71 | 0.69 | 0.82 |
| S32* | SD | 0.03 | 0.03 | 0.03 | 0.03 | 0.05 | 0.03 | 0.05 | 0.05 | 0.05 | 0.05 | 0.04 | 0.05 | 0.05 | 0.05 | 0.73 | 0.69 | 0.84 |
| S33* | SD | 0.02 | 0.02 | 0.03 | 0.03 | 0.04 | 0.03 | 0.04 | 0.04 | 0.04 | 0.04 | 0.04 | 0.04 | 0.04 | 0.04 | 0.79 | 0.71 | 0.83 |
| S34* | SD | 0.02 | 0.03 | 0.03 | 0.03 | 0.05 | 0.03 | 0.05 | 0.05 | 0.05 | 0.05 | 0.05 | 0.05 | 0.05 | 0.05 | 0.74 | 0.69 | 0.82 |
| S35* | SD | 0.02 | 0.02 | 0.02 | 0.02 | 0.03 | 0.02 | 0.03 | 0.03 | 0.03 | 0.03 | 0.03 | 0.03 | 0.03 | 0.03 | 0.76 | 0.71 | 0.82 |
| S36* | SD | 0.02 | 0.02 | 0.03 | 0.03 | 0.04 | 0.03 | 0.04 | 0.04 | 0.04 | 0.04 | 0.03 | 0.04 | 0.03 | 0.03 | 0.86 | 0.72 | 0.85 |
| S37* | SD | 0.01 | 0.01 | 0.02 | 0.02 | 0.02 | 0.02 | 0.02 | 0.02 | 0.02 | 0.02 | 0.02 | 0.03 | 0.02 | 0.02 | 0.72 | 0.69 | 0.83 |
| S38* | SD | 0.02 | 0.02 | 0.03 | 0.03 | 0.04 | 0.03 | 0.04 | 0.04 | 0.04 | 0.04 | 0.04 | 0.04 | 0.04 | 0.04 | 0.77 | 0.70 | 0.83 |

Data marked with “\*” refers to sample previously reported by Liang et al [45].

Table S4 Zr, Sc, Th, Hf, Fe, Mn, Sr, Al, Ti and SiO<sub>2</sub> concentrations of different types of dolomites in the Xixiangchi Formation.

| Sample No. | phase | Zr<br>(ppm) | Sc<br>(ppm) | Th<br>(ppm) | Hf<br>(ppm) | Fe<br>(ppm) | Mn<br>(ppm) | Sr<br>(ppm) | Mn/Sr | Al<br>(ppm) | Ti<br>(ppm) | SiO <sub>2</sub><br>(%) |
|------------|-------|-------------|-------------|-------------|-------------|-------------|-------------|-------------|-------|-------------|-------------|-------------------------|
| S1*        | D1    | 0.07        | 0.4         | 0.20        | 0.003       | 3480        | 260         | 52          | 5.0   | 2085        | 4.3         | 2.5                     |
| S2*        | D1    | 0.03        | 0.2         | 0.08        | 0.002       | 3180        | 50          | 37          | 1.3   | 916         | 2.2         | 0.8                     |
| S4*        | D1    | 0.08        | 0.5         | 0.35        | 0.004       | 3340        | 80          | 80          | 1.0   | 2636        | 2.3         | 2.4                     |
| S5*        | D1    | 0.05        | 0.5         | 0.30        | 0.004       | 4680        | 110         | 54          | 2.0   | 2112        | 3.1         | 3.4                     |
| S6*        | D1    | 0.09        | 0.5         | 0.30        | 0.004       | 9040        | 110         | 35          | 3.2   | 8012        | 1.5         | 6.3                     |
| S8*        | D1    | 0.17        | 0.7         | 0.65        | 0.008       | 6560        | 110         | 59          | 1.9   | 4218        | 4.3         | 4.7                     |
| S10*       | D1    | 0.10        | 0.6         | 0.43        | 0.006       | 5040        | 130         | 62          | 2.1   | 3101        | 4.2         | 3.6                     |
| S11*       | D2    | 0.04        | 0.3         | 0.20        | 0.002       | 5860        | 270         | 83          | 3.3   | 2524        | 1.8         | 3.9                     |
| S12*       | D2    | 0.12        | 0.8         | 0.53        | 0.005       | 11600       | 180         | 50          | 3.6   | 7907        | 2.5         | 0.7                     |

|      |    |      |     |      |       |      |     |     |     |      |     |     |
|------|----|------|-----|------|-------|------|-----|-----|-----|------|-----|-----|
| S13* | D2 | 0.04 | 0.2 | 0.13 | 0.002 | 2040 | 170 | 31  | 5.4 | 868  | 2.2 | 1.3 |
| S14* | D2 | 0.04 | 0.3 | 0.17 | 0.002 | 3180 | 180 | 37  | 4.9 | 1524 | 2.8 | 1.3 |
| S15* | D2 | 0.03 | 0.4 | 0.16 | 0.002 | 2940 | 150 | 34  | 4.4 | 1413 | 2.1 | 2.9 |
| S16* | D2 | 0.08 | 0.4 | 0.35 | 0.004 | 5760 | 270 | 91  | 3.0 | 1662 | 3.9 | 2.8 |
| S18* | D2 | 0.07 | 0.4 | 0.33 | 0.004 | 5380 | 160 | 70  | 2.3 | 3641 | 3.1 | 2.8 |
| S19* | D2 | 0.12 | 1.2 | 0.45 | 0.005 | 4100 | 200 | 66  | 3.0 | 4027 | 4.1 | 2.3 |
| S21* | D2 | 0.06 | 0.5 | 0.31 | 0.003 | 3220 | 140 | 35  | 4.0 | 1561 | 2.8 | 1.1 |
| S23  | D3 | 0.09 | 0.3 | 0.27 | 0.003 | 5080 | 130 | 151 | 0.9 | 1815 | 3.2 | 1.6 |
| S24  | D3 | 0.05 | 0.3 | 0.21 | 0.002 | 4560 | 170 | 30  | 5.6 | 2138 | 2.6 | 1.9 |
| S25  | D3 | 0.05 | 0.2 | 0.11 | 0.002 | 3420 | 180 | 196 | 0.9 | 1027 | 1.5 | 0.8 |
| S26  | D3 | 0.06 | 0.3 | 0.14 | 0.002 | 3840 | 180 | 234 | 0.8 | 1286 | 1.8 | 1.2 |
| S27  | D3 | 0.05 | 0.5 | 0.32 | 0.002 | 7900 | 380 | 108 | 3.5 | 2175 | 1.8 | 3.2 |
| S29* | SD | 0.02 | 0.7 | 0.06 | 0.002 | 1580 | 210 | 275 | 0.8 | 1582 | 0.4 | 2.8 |



|      |    |      |     |      |       |      |     |     |     |      |     |     |
|------|----|------|-----|------|-------|------|-----|-----|-----|------|-----|-----|
| S30* | SD | 0.02 | 1.1 | 0.05 | 0.002 | 1240 | 200 | 466 | 0.4 | 1233 | 0.4 | 1.5 |
| S31* | SD | 0.01 | 0.9 | 0.04 | 0.002 | 1160 | 270 | 334 | 0.8 | 847  | 0.3 | 0.9 |
| S32* | SD | 0.02 | 0.8 | 0.04 | 0.002 | 1160 | 220 | 252 | 0.9 | 1090 | 0.3 | 1.6 |
| S33* | SD | 0.02 | 0.7 | 0.06 | 0.001 | 1360 | 330 | 275 | 1.2 | 1381 | 0.4 | 2.0 |
| S34* | SD | 0.01 | 0.5 | 0.02 | 0.001 | 900  | 340 | 275 | 1.2 | 609  | 0.2 | 1.1 |
| S35* | SD | 0.01 | 0.3 | 0.01 | 0.001 | 1000 | 330 | 180 | 1.8 | 799  | 0.3 | 1.0 |
| S36* | SD | 0.02 | 0.6 | 0.05 | 0.002 | 800  | 340 | 229 | 1.5 | 471  | 0.5 | 0.7 |
| S37* | SD | 0.01 | 0.3 | 0.01 | 0.001 | 780  | 230 | 145 | 1.6 | 482  | 0.2 | 0.4 |
| S38* | SD | 0.03 | 0.7 | 0.05 | 0.002 | 1080 | 250 | 257 | 1.0 | 762  | 0.5 | 0.9 |

---

Data marked with “\*” refers to the Fe, Mn, and Sr concentrations of the sample previously reported by Liang et al [45].
